# Supplementary material for: Nature-inspired compositional control of transition-metal-doped ammoniotinsleyite and spheniscidite particles for design of color hue
Source: Royal Society of Chemistry journal article supplement (doi:10.1039/d2ce01662a), 2023-01-01
Supplement: d2ce01662a1.pdf [file d2ce01662a1.pdf]

## Supporting information

# Nature-inspired compositional control of transition-metal-doped ammoniotinsleyite and spheniscidite particles for the design of color hue

Hiroaki Uchiyama\*, Daisuke Nagoshi and Yuki Nagasu

### Corresponding Author

Hiroaki Uchiyama, Department of Chemistry and Materials Engineering, Kansai University, 3-3-35 Yamate-cho, Suita, 564-8680, Japan. E-mail: [h\\_uchi@kansai-u.ac.jp](mailto:h_uchi@kansai-u.ac.jp) (H. Uchiyama)

### Authors

Daisuke Nagoshi and Yuki Nagasu, Department of Chemistry and Materials Engineering, Kansai University, 3-3-35 Yamate-cho, Suita, 564-8680, Japan

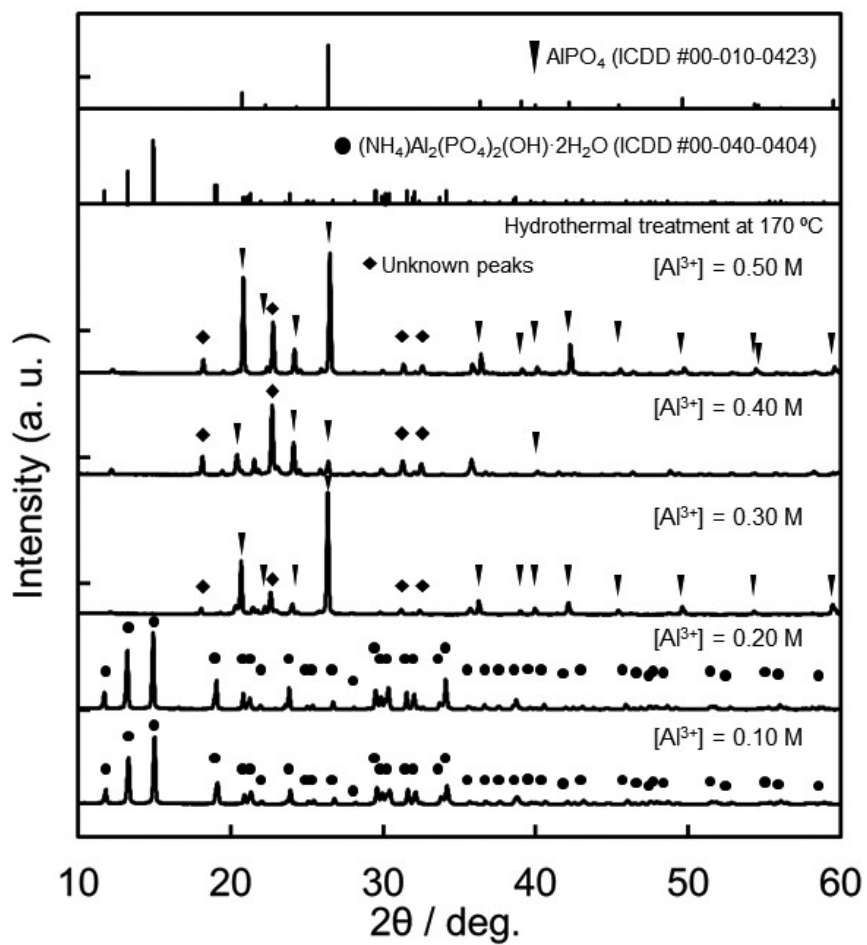

**Fig. S1** XRD patterns of the aluminum phosphate precipitates obtained at  $[AlCl_3] = 0.10\text{--}0.50$  M by hydrothermal treatment at 170 °C.

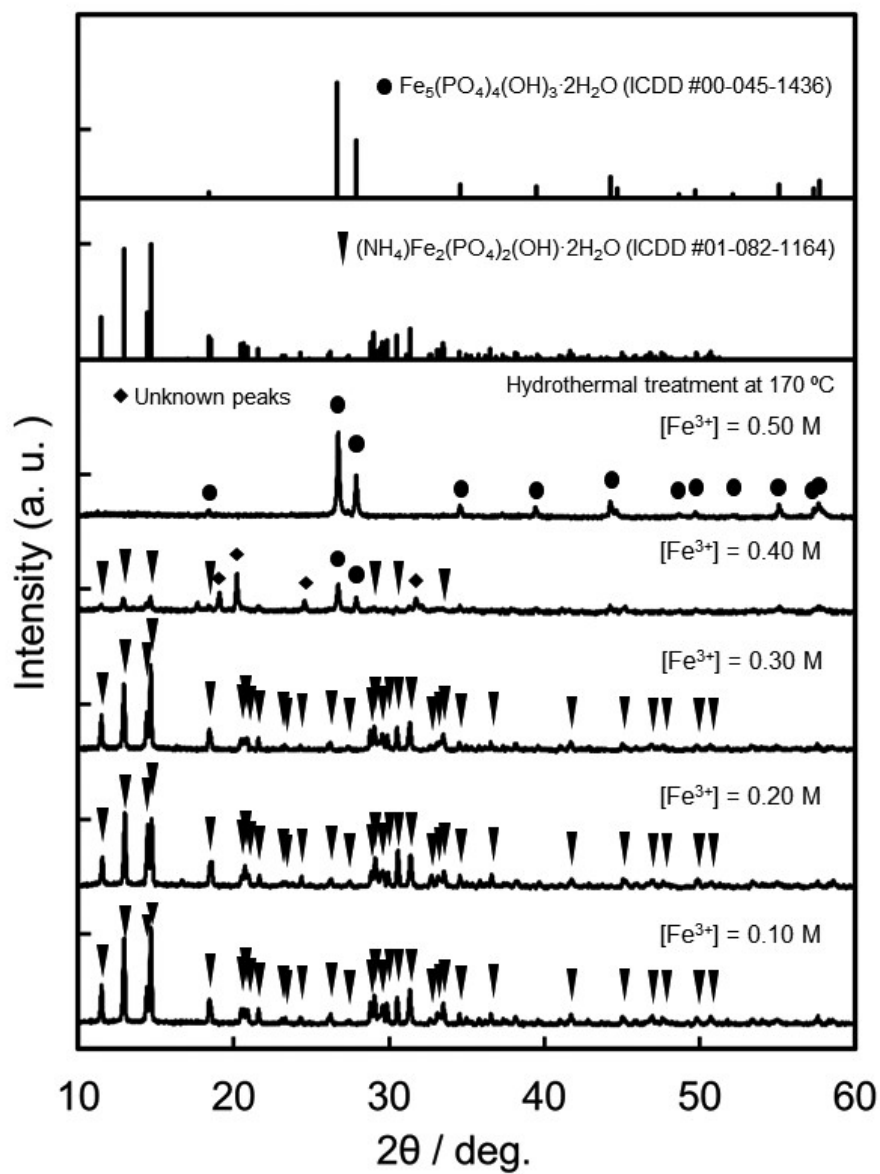

**Fig. S2** XRD patterns of the iron phosphate precipitates obtained at  $[\text{FeCl}_3 \cdot 6\text{H}_2\text{O}] = 0.10\text{--}0.50$  M by hydrothermal treatment at 170 °C.

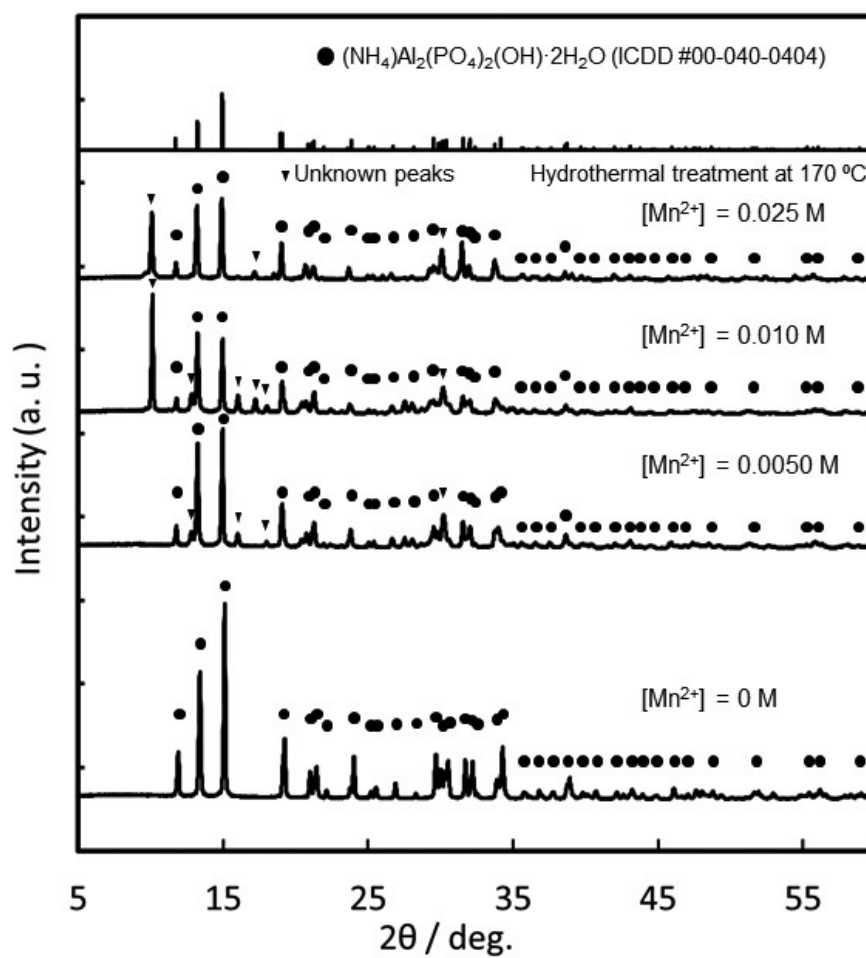

**Fig. S3** XRD patterns of the  $\text{Mn}^{2+}$ -doped aluminum phosphate precipitates obtained at  $[\text{AlCl}_3] = 0.10 \text{ M}$  and  $[\text{MnCl}_2 \cdot 4\text{H}_2\text{O}] = 0\text{--}0.025 \text{ M}$  by hydrothermal treatment at 170 °C.

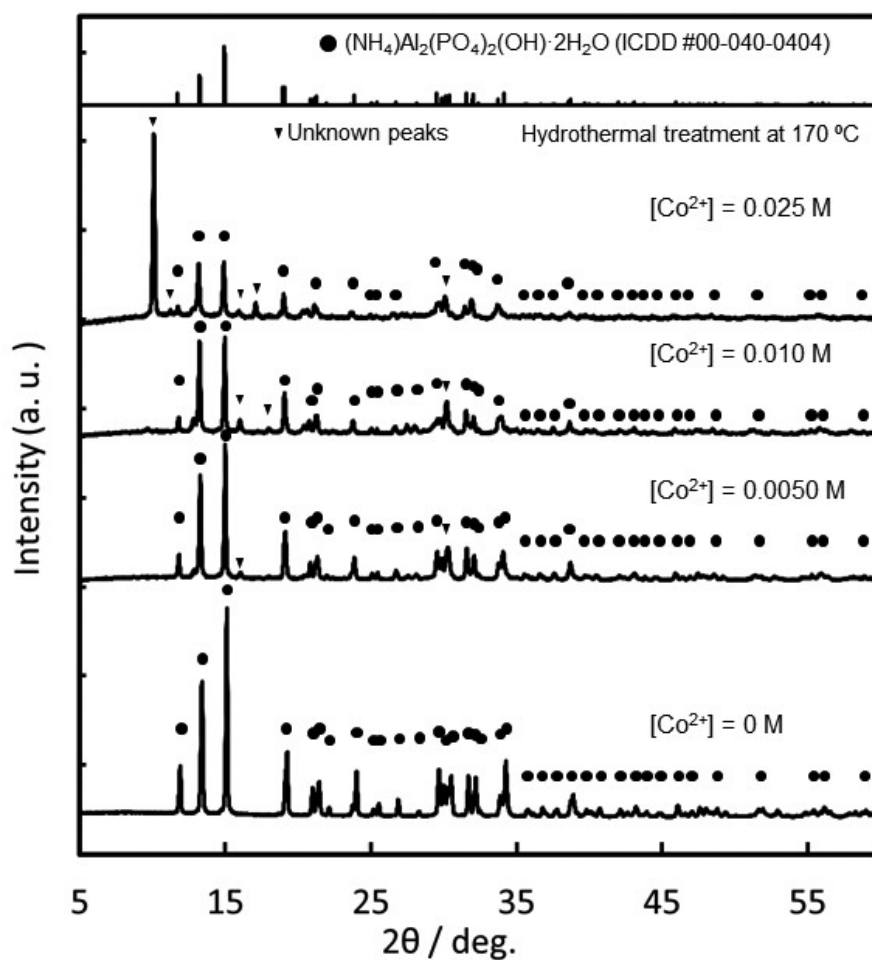

**Fig. S4** XRD patterns of the  $\text{Co}^{2+}$ -doped aluminum phosphate precipitates obtained at  $[\text{AlCl}_3] = 0.10\text{ M}$  and  $[\text{CoCl}_2 \cdot 6\text{H}_2\text{O}] = 0\text{--}0.025\text{ M}$  by hydrothermal treatment at  $170\text{ }^\circ\text{C}$ .

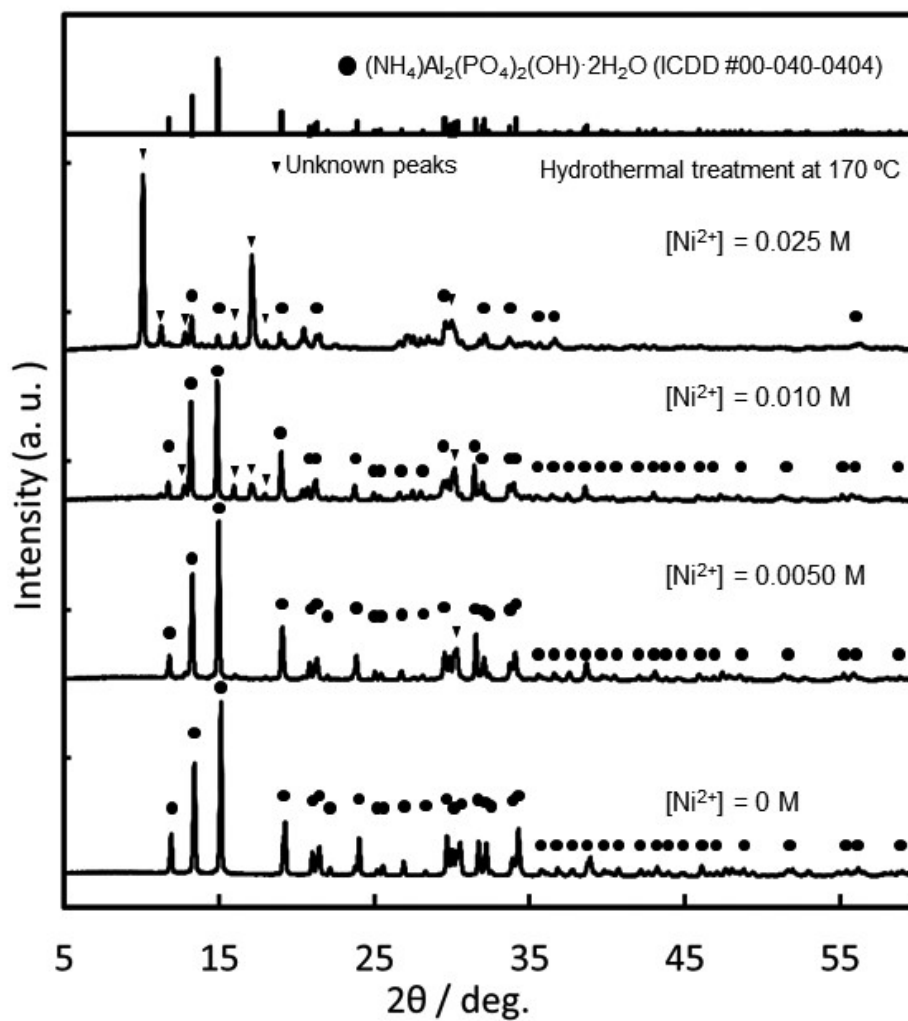

**Fig. S5** XRD patterns of the  $\text{Ni}^{2+}$ -doped aluminum phosphate precipitates obtained at  $[\text{AlCl}_3] = 0.10$  M and  $[\text{NiCl}_2 \cdot 6\text{H}_2\text{O}] = 0\text{--}0.025$  M by hydrothermal treatment at  $170^\circ\text{C}$ .

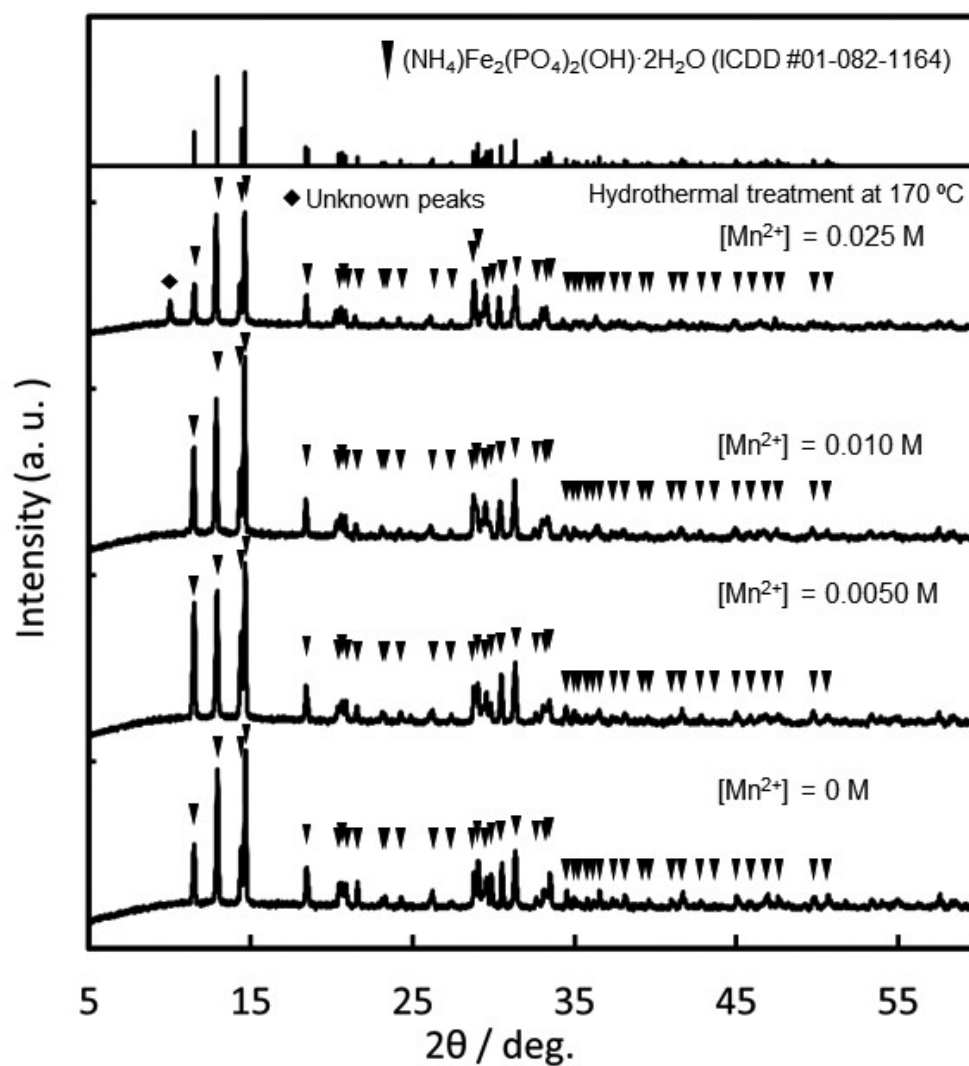

**Fig. S6** XRD patterns of the  $\text{Mn}^{2+}$ -doped iron phosphate precipitates obtained at  $[\text{FeCl}_3 \cdot 6\text{H}_2\text{O}] = 0.10 \text{ M}$  and  $[\text{MnCl}_2 \cdot 4\text{H}_2\text{O}] = 0\text{--}0.025 \text{ M}$  by hydrothermal treatment at 170 °C.

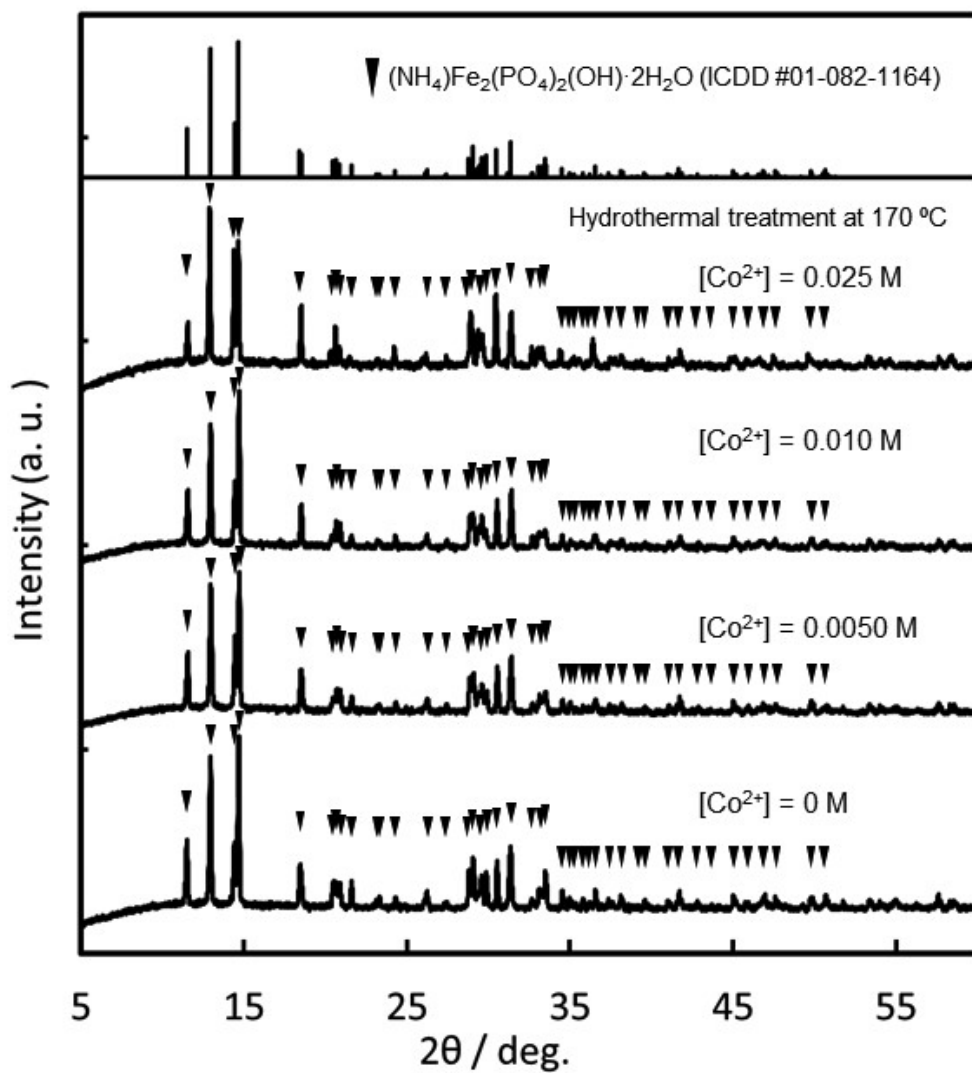

**Fig. S7** XRD patterns of the Co<sup>2+</sup>-doped iron phosphate precipitates obtained at [FeCl<sub>3</sub>·6H<sub>2</sub>O] = 0.10 M and [CoCl<sub>2</sub>·6H<sub>2</sub>O] = 0–0.025 M by hydrothermal treatment at 170 °C.



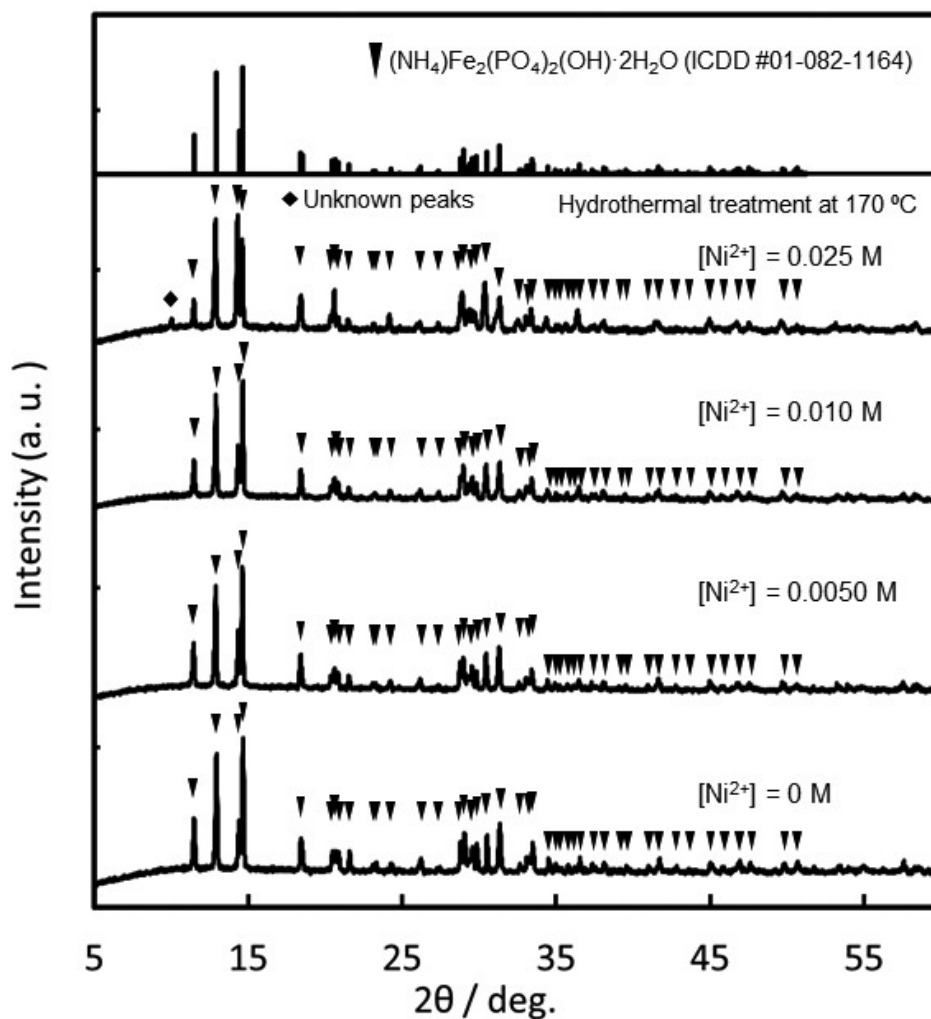

**Fig. S8** XRD patterns of the  $\text{Ni}^{2+}$ -doped iron phosphate precipitates obtained at  $[\text{FeCl}_3 \cdot 6\text{H}_2\text{O}] = 0.10 \text{ M}$  and  $[\text{NiCl}_2 \cdot 6\text{H}_2\text{O}] = 0\text{--}0.025 \text{ M}$  by hydrothermal treatment at 170 °C.

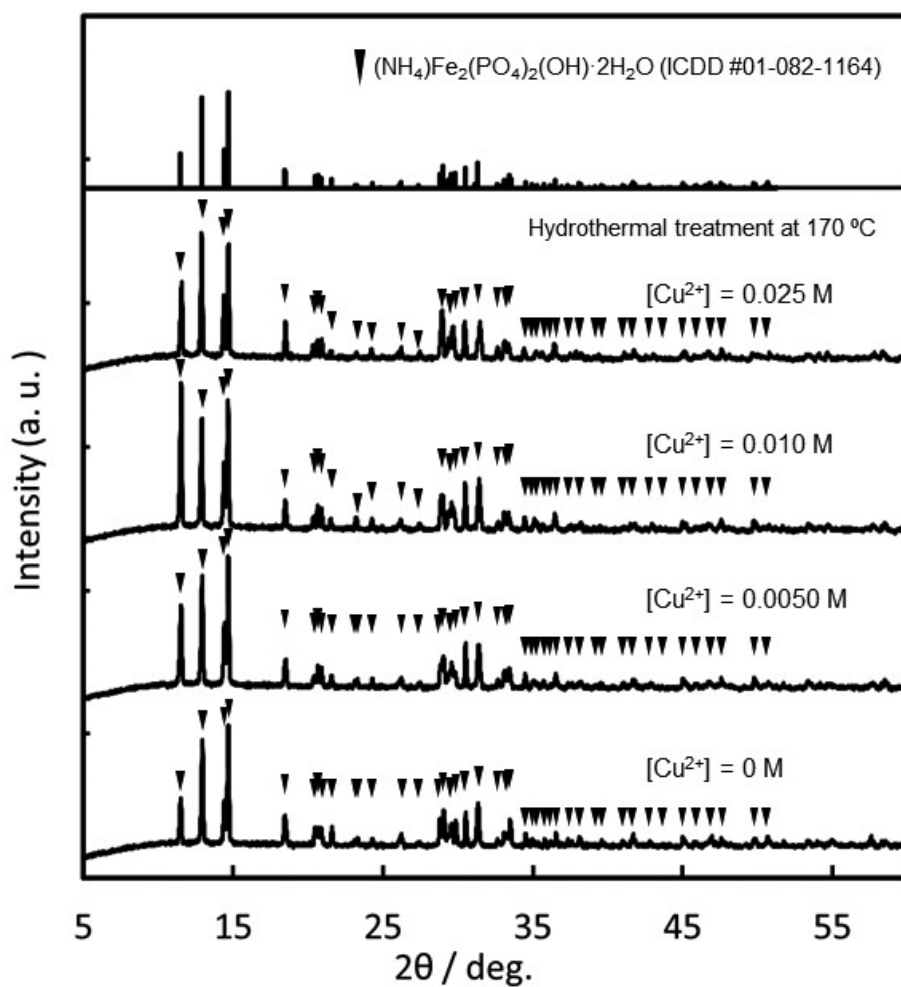

**Fig. S9** XRD patterns of the  $\text{Cu}^{2+}$ -doped iron phosphate precipitates obtained at  $[\text{FeCl}_3 \cdot 6\text{H}_2\text{O}] = 0.10 \text{ M}$  and  $[\text{CuCl}_2] = 0\text{--}0.025 \text{ M}$  by hydrothermal treatment at 170 °C.

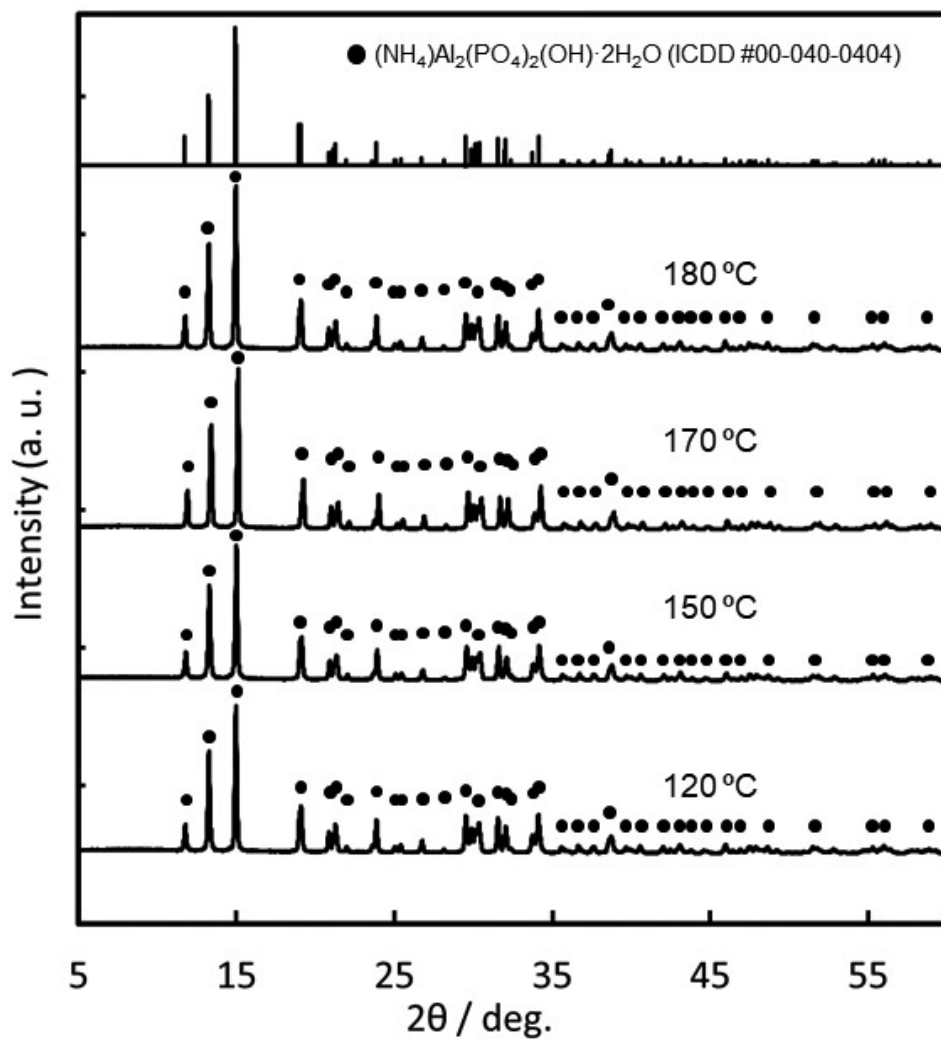

**Fig. S10** XRD patterns of the ammoniotinsleyite samples obtained at  $[\text{AlCl}_3] = 0.10 \text{ M}$  by hydrothermal treatment at 120–180 °C.

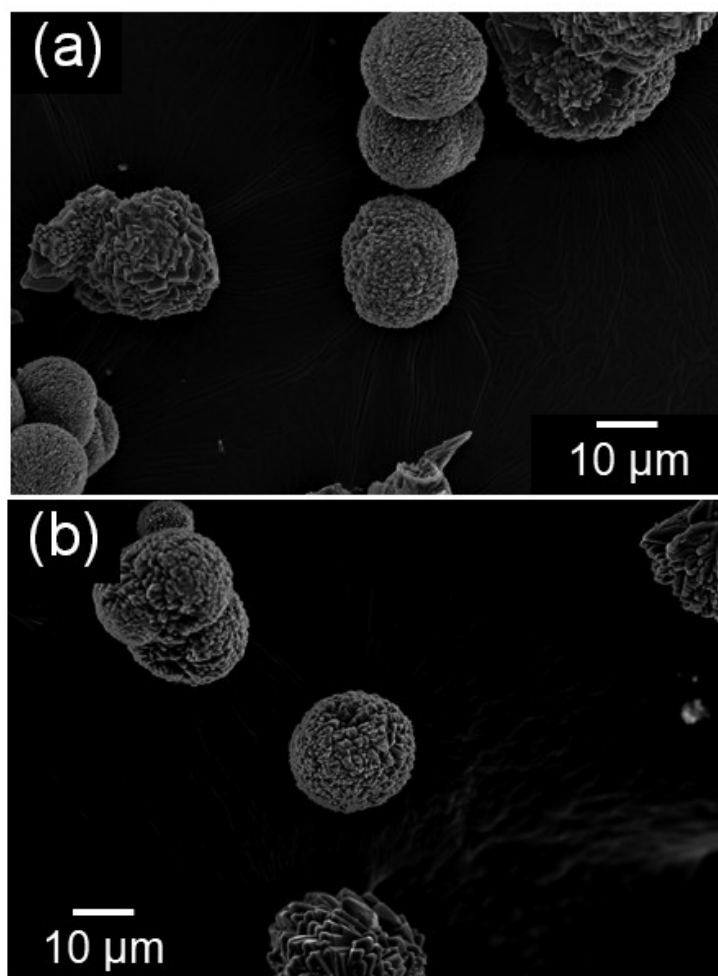

**Fig. S11** SEM images of the ammoniotinsleyite samples obtained at  $[\text{AlCl}_3] = 0.10 \text{ M}$  by hydrothermal treatment at 120 (a) and 170 (b) °C.

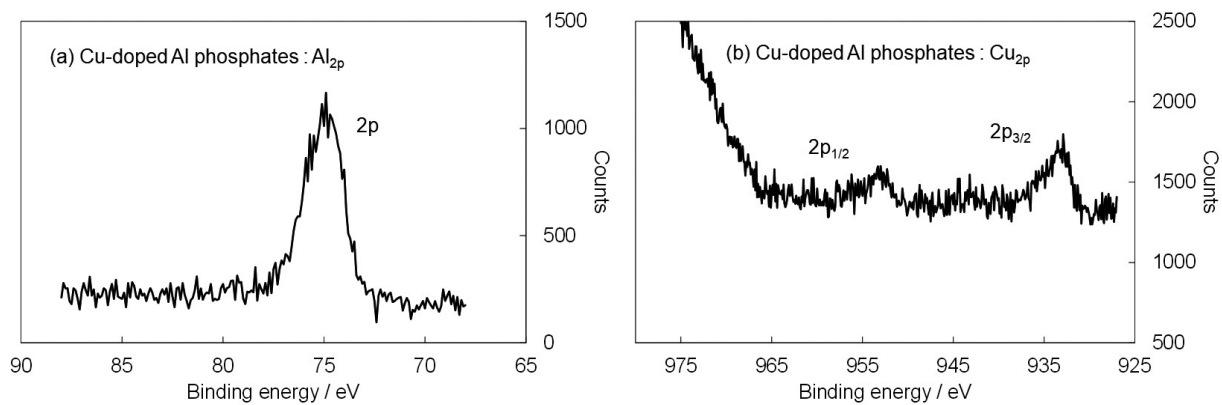

**Fig. S12** XPS spectra of the Cu<sup>2+</sup>-doped ammoniotinsleyite samples obtained at [AlCl<sub>3</sub>] = 0.10 M and [CuCl<sub>2</sub>] = 0.010 M by hydrothermal treatment at 170 °C; Al<sub>2p</sub> (a) and Cu<sub>2p</sub> (b).

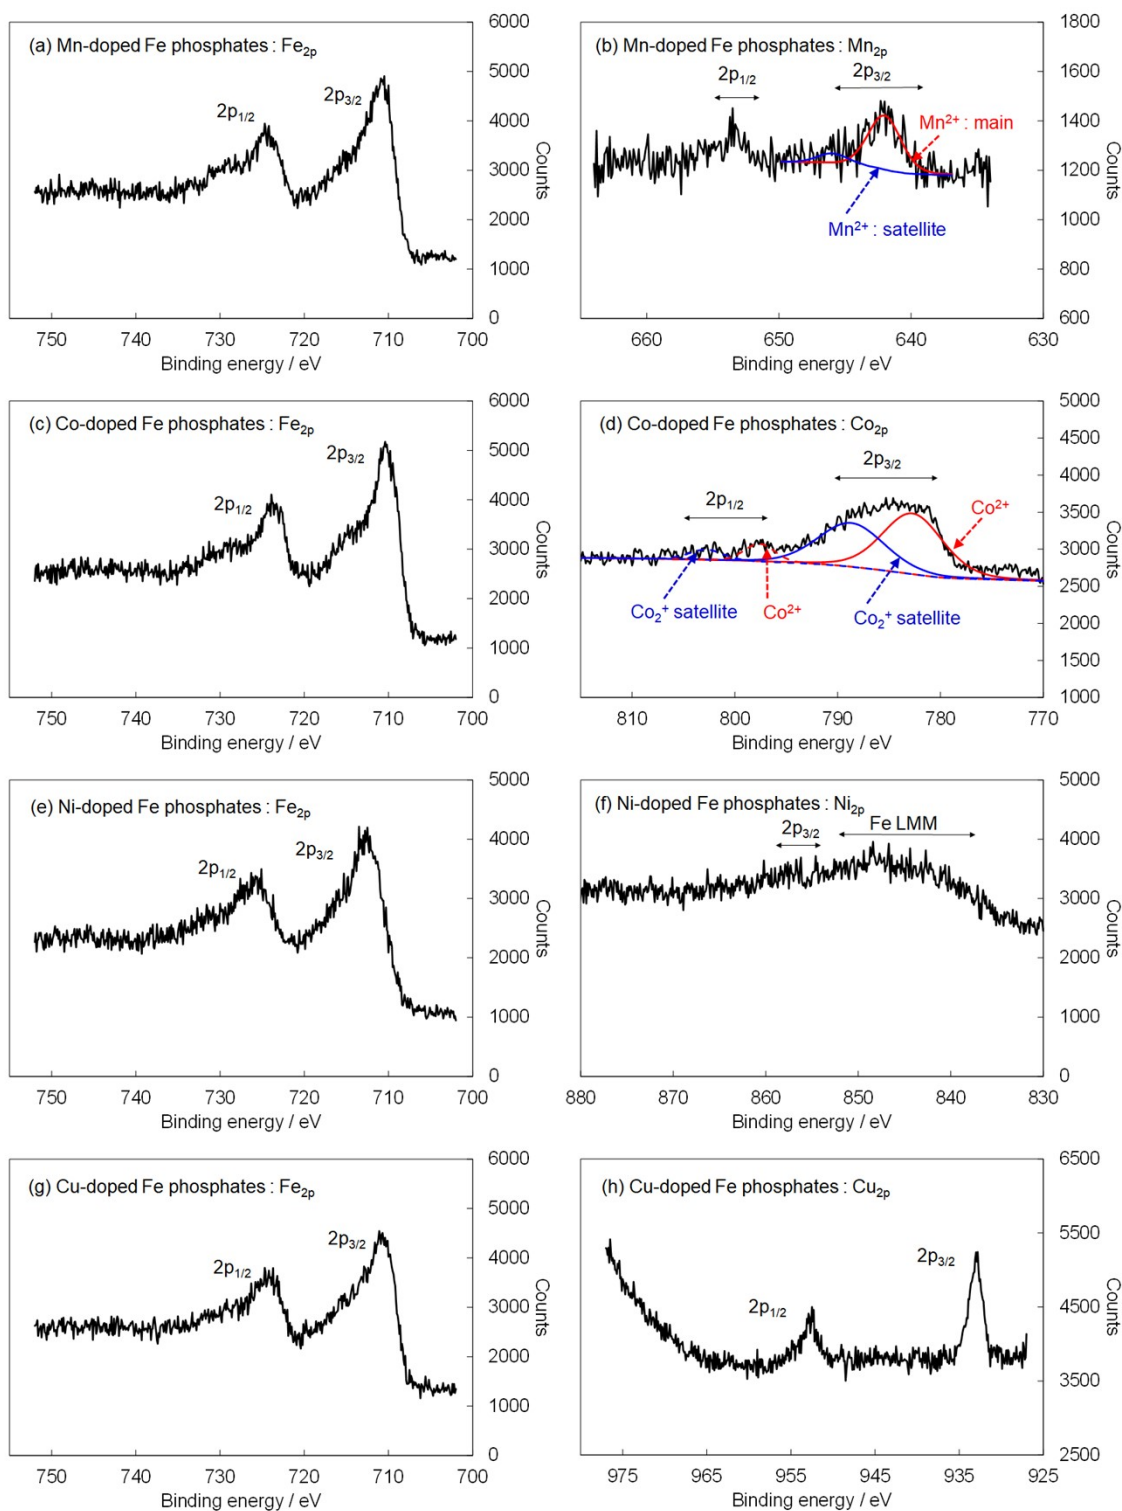

**Fig. S13** XPS spectra of the transition metal-doped spheniscidite samples obtained at  $[\text{MnCl}_2 \cdot 4\text{H}_2\text{O}] = 0.010 \text{ M}$ ,  $[\text{CoCl}_2 \cdot 6\text{H}_2\text{O}] = 0.025 \text{ M}$ ,  $[\text{NiCl}_2 \cdot 6\text{H}_2\text{O}] = 0.010 \text{ M}$  or  $[\text{CuCl}_2] = 0.025 \text{ M}$  by hydrothermal treatment at  $120 \text{ }^\circ\text{C}$ ;  $\text{Mn}^{2+}$ -doped:  $\text{Fe}_{2\text{p}}$  (a) and  $\text{Mn}_{2\text{p}}$  (b),  $\text{Co}^{2+}$ -doped:  $\text{Fe}_{2\text{p}}$  (c) and  $\text{Co}_{2\text{p}}$  (d),  $\text{Ni}^{2+}$ -doped:  $\text{Fe}_{2\text{p}}$  (e) and  $\text{Ni}_{2\text{p}}$  (f),  $\text{Cu}^{2+}$ -doped:  $\text{Fe}_{2\text{p}}$  (g) and  $\text{Cu}_{2\text{p}}$  (h).
